# Supplementary material
Source: PubMed Central journal article supplement (PMC6693003)
Supplement: ba031914-suppl1.pdf [file ba031914-suppl1.pdf]

## Description of two real world cases of MGRS

Case-1: Patient X presented with heavy proteinuria and a concomitant light-chain MG (baseline eGFR 36 ml/min, CKD stage 3b). Renal biopsy revealed a monoclonal immunoglobulin deposition disease of the kappa light chain subtype (LCDD-κ. He achieved a hematological remission (VGPR) and a renal response (eGFR 48 ml/min) post 6 cycles of VCD (bortezomib, cyclophosphamide and dexamethasone) and continues to be dialysis independent and sustained hematological remission at 18-months of follow-up.

Case-2: Patient Y presented with heavy proteinuria and a concomitant MG (IgGκ) [baseline eGFR 24 ml/min, CKD stage 4). Renal biopsy was consistent with LCDD. Patient was started on a combination of cyclophosphamide, thalidomide and dexamethasone (CTD). Following 3 cycles of CTD, he achieved less than partial hematological response and his therapy was changed to VCD. After 2 cycles of VCD, he achieved PR. Renal function however worsened (eGFR 14 ml/min, CKD stage 5) and he became dialysis dependent. He continues on renal replacement therapy at 3-years of follow-up (not a candidate for renal allograft) and is off-chemotherapy due to non-tolerance.

Table S1: Summary of the available literature regarding the renal outcomes and recurrence rates in the renal allograft in MGRS

| MGRS entity           | Author (year)                           | Sample size          | Treatment regimens used (no. of patients)                                                                                 | Hematological response (no. of patients) | Renal response (no. of patients)                                                       | Renal outcome and OS (no. of patients)                                                                                                                 | Recurrence after renal transplant                                                  |
|-----------------------|-----------------------------------------|----------------------|---------------------------------------------------------------------------------------------------------------------------|------------------------------------------|----------------------------------------------------------------------------------------|--------------------------------------------------------------------------------------------------------------------------------------------------------|------------------------------------------------------------------------------------|
| MIDD                  | Sayed et al <sup>64</sup> (2015)        | 53                   | T (11), V (9), ASCT (4), R (1), Steroids (1), alkylator (6)                                                               | CR/VGPR (21)<br>PR/NR (11)               | CR/VGPR- GFR increased by 6.1 ml/min/yr<br>PR/NR- 6.5 ml/min/yr loss of GFR            | RS- 5.4 yr<br>OS- 14 yr<br>stable/improved function (57%)<br>ESRD (53%)                                                                                | Recurrence after 1.6 yr and 1.9 yr respectively (2/7=28.5%)<br>No recurrence (4)   |
|                       | Kourelis et al <sup>89</sup> (2016)     | 88                   | PI/ASCT (60%)                                                                                                             | CR/VGPR (42%)<br>(PI/ASCT- 77%/56%)      | Overall-34%<br>CR/VGPR- 57%/17%)                                                       | 5-Yr RS-57%<br>(CR/VGPR-77%, PR/NR-54%)<br>5-yr OS-67%                                                                                                 | Recurrence (3/9 =33.3%)<br>Hematological progression without renal progression (6) |
| C3G                   | Zand et al <sup>24</sup> (2014)         | 21*                  | IM before transplant (6), pred (3), Pred+CSA (1)<br>Pred+Cyclo (1), MMF/IVIG (1)                                          | NA                                       | NA                                                                                     | No recurrence (7),<br>recurrence (14)<br>recurrence was earlier in 3 patients with MG                                                                  | Recurrence (14/21= 66.7%)- amongst them- 50% had graft failure-                    |
|                       | Lloyd et al <sup>58</sup> (2016)        | 12                   | V-based** (8/4 patients of MM)                                                                                            | HR (1 out of 8)                          | RRT (5), stable function (3), improvement (1)                                          | ESRD (56%)                                                                                                                                             | Recurrence after 18 months (1/1=100%)                                              |
|                       | Chauvet et al <sup>11</sup> (2017)      | 50                   | Chemo (29) including V-based (22)<br>IST (8)                                                                              | Overall-37%<br>(chemo-59%)               | Overall-42%<br>Chemo-74%                                                               | RS- chemo > no chemo, HR> no HR, CR/VGPR> PR/NR<br>ESRD-50% (Chemo-31%)                                                                                | Recurrence (4/4 =100%)- all received no chemo before transplant                    |
| aHUS                  | Ravindran et al <sup>12</sup> (2016)    | 146<br>(20 had a MG) | V-2, T-1<br>TPE/steroids/IST (remaining)                                                                                  | NA                                       | NA                                                                                     | With MG- 50% had ESRD<br>Without MG-33% had ESRD                                                                                                       | Recurrence?                                                                        |
| PGNMID                | Nasr SH et al <sup>91</sup> (2009)      | 37                   | IM (18)<br>Steroid alone (6),<br>Pred+Cyclo/Clb (3)<br>Pred+T (1)<br>Pred +V (1)<br>MMF based (3),<br>Rituximab based (4) | NA                                       | NA                                                                                     | Overall: CR/PR-38%, PRD-38%, ESRD-22%<br><br>18 patients with IM: CR/PR (8), PRD (7), ESRD (3)                                                         | NA                                                                                 |
|                       | Nasr SH et al <sup>22</sup> (2011)      | 4*                   | Pred+R (3)<br>Pred+Cyclo (1)                                                                                              | NA                                       | All 4 responded                                                                        | Reduced proteinuria-4<br>Reduced creatinine-3<br>Reduced histologic activity-4                                                                         | Median 3.8 months after transplant                                                 |
|                       | Said et al <sup>26</sup> (2018)         | 26**                 | IM (16) (after recurrence)<br>R (13), S (12), Cyclo (5), V (3), RCHOP (1), Eculizumab (1), ASCT (1)                       | NA                                       | Response***- 60% of patients with recurrence                                           | Graft loss-44%<br>Median Graft survival-92 months                                                                                                      | 89% had recurrence (median- 5.5 months)                                            |
|                       | Gumber et al <sup>92</sup> (2018)       | 19                   | Chemotherapy alone:<br>Clone-directed (4)<br>Non-directed (2)<br>Empirical (10)                                           | NA                                       | CR (6), PR (7),<br>None (3)<br>1 non-responder initially had PR to second-line therapy | Treatment group (16)- no ESRD<br>No treatment group (3)- all progressed to ESRD<br>6 relapsed, but 4/5 relapsed cases responded to second-line therapy | No patient underwent kidney transplant.                                            |
| MN with monoclonal Ig | Guiard et al <sup>19</sup> (2011)       | 14                   | IM (10)<br>Rituximab (2)                                                                                                  | NA                                       | Renal response associated with HR                                                      | ESRD (3)<br>CR/PR (8)<br>NR (1)                                                                                                                        | Recurrence (1/2=50%)                                                               |
| ITG                   | Nasr SH et al (2012) <sup>51</sup>      | 16                   | IM (10)<br>Steroid alone (2)<br>Rituximab based (2)<br>ASCT (1)                                                           | NA                                       | ITG remission in 3 patients with Lymphoma                                              | Remission-50%, ESRD-17%, PRD-33%                                                                                                                       | NA                                                                                 |
|                       | Mallett et al <sup>93</sup> 2015        | 11                   | NA                                                                                                                        | NA                                       | NA                                                                                     | Overall survival-2.93 yr<br>75% patient survival and 100% renal allograft survival                                                                     | Recurrence (1/4 =25%)- median 2.1 yr                                               |
| FG                    | Czarnecki PG et al <sup>20</sup> (2009) | 7                    | IM (3)<br>Cyclo-Pred, Dexa, Mel                                                                                           | NA                                       | NA                                                                                     | 6 allograft failures- median survival 37 months                                                                                                        | Recurrence (5/7 =71%)                                                              |
|                       | Nasr SH et al <sup>52</sup> (2011)      | 66                   | IM (29)<br>Steroid alone (8)<br>Steroid +IM (16)<br>IM without steroid (5), Rituximab (3)                                 | NA                                       | NA                                                                                     | CR/PR-13%, PRD-43%, ESRD-44%                                                                                                                           | 36% of 14 at a median F/u of 51 months                                             |

|                         |                                      |                                              |                                                                                                   |                                                                                           |                                                                                                                          |                                                                                                                  |                                                 |
|-------------------------|--------------------------------------|----------------------------------------------|---------------------------------------------------------------------------------------------------|-------------------------------------------------------------------------------------------|--------------------------------------------------------------------------------------------------------------------------|------------------------------------------------------------------------------------------------------------------|-------------------------------------------------|
| MPGN with monoclonal Ig | Lorenz et al <sup>25</sup><br>(2010) | 29 <sup>#</sup>                              | Rituximab (4)<br>BMT (2), TPE (4)                                                                 | NA                                                                                        | 4 underwent TPE: reduction in proteinuria with TPE (3), dialysis dependent (1), graft loss (1)                           | MG was higher Amongst rMPGN vs those without rMPGN.                                                              | Recurrence (12/29= 44.1%): median of 3.3 months |
| LCPT                    | Stokes et al <sup>41</sup><br>(2016) | 30-<br>crystalline<br>6- non-<br>crystalline | Crystalline:<br>ASCT+chemo (10),<br>chemo alone (12),<br>Non-crystalline-<br>chemo (5), ASCT (1), | Crystalline: CR (5), VGPR (1), PR (3), SD (21)<br>Non-crystalline: CR (2), SD (2), PR (1) | Improved (7), stable (11), worsening (4), ESRD (0), Death (4)<br>Non-crystalline- improved (1), stable (1), worsened (1) | Crystalline- median renal survival: 135 ± 5.5 months<br>Non-crystalline- median renal survival: 64 ± 17.8 months | NA                                              |

\* 21 patients with renal transplant were included in this study.

\*\* none of the patients with MG without MM received chemotherapy

+ study included 4 patients with recurrent disease post renal transplant, treatment regimens showed indicate treatment received by the patients' post-recurrence.

++ includes 26 patients of PGNMID allograft

+++response was defined as >50% decrease in proteinuria, <25% increase creatinine

# includes 29 patients with recurrent MPGN after renal transplant and treatment indicates the therapy received by the patients after recurrence.

Yr-years, T- thalidomide, V- Velcade, R-Rituximab, ASCT- autologous stem cell transplant, CR- complete response, VGPR- very good partial response, PR- partial response, NR- no response, GFR- glomerular filtration rate, RS- renal survival, OS- overall survival, ESRD- end stage renal disease, PI- proteasome inhibitor, IM-immunomodulatory treatment, Pred- prednisolone, CSA- cyclosporine, cyclo-cyclophosphamide, MMF- mycophenolate, IVIG- IV immunoglobulin, MM- multiple myeloma, HR- hematological response, Chemo- chemotherapy, IST- Immunosuppressive therapy, NA- not available, clb- chlorambucil, PRD- persistent renal dysfunction, R- Rituximab, S- steroids, RCHOP- Rituximab/cyclophosphamide/doxorubicin/vincristine/prednisolone, Dexa- dexamethasone, Mel- Melphalan, rMPGN- recurrent MPGN, SD- Stable disease, TPE- Therapeutic plasma exchange, BMT-Bone marrow transplantation.
